# Supplementary material for: Amplification of a cyclic mixed-metalloporphyrin tetramer from a dynamic combinatorial library through orthogonal metal coordinationElectronic supplementary information (ESI) available: Fig. S1â€“3: 1H NMR, 1Hâ€“1H COSY and 1Hâ€“1H NOESY spectra of (4,4â€²-bipy)âŠ‚[(Zn-1)2/(Rh-2)2] at 300 K. See http://www.rsc.org/suppdata/cc/b1/b111019p/
Source: Royal Society of Chemistry journal article supplement (doi:10.1039/b111019p), 2002-02-13

**Amplification of a cyclic mixed-metalloporphyrin tetramer from a dynamic combinatorial library through orthogonal metal coordination**

Eugen Stulz,* Yiu-Fai Ng, Sonya M. Scott and Jeremy K. M. Sanders*

Fig. S1: 400 MHz 1H NMR spectrum of (4,4'-bipy)[(**Zn-1**)2/(**Rh-2**)2] at 300 K.

Fig. S2: 500 MHz 1H-1H COSY spectrum of (4,4'-bipy)[(**Zn-1**)2/(**Rh-2**)2] at 300 K.

Fig. S3: 500 MHz 1H-1H NOESY spectrum of (4,4'-bipy)[(**Zn-1**)2/(**Rh-2**)2] at 300 K.

S1:


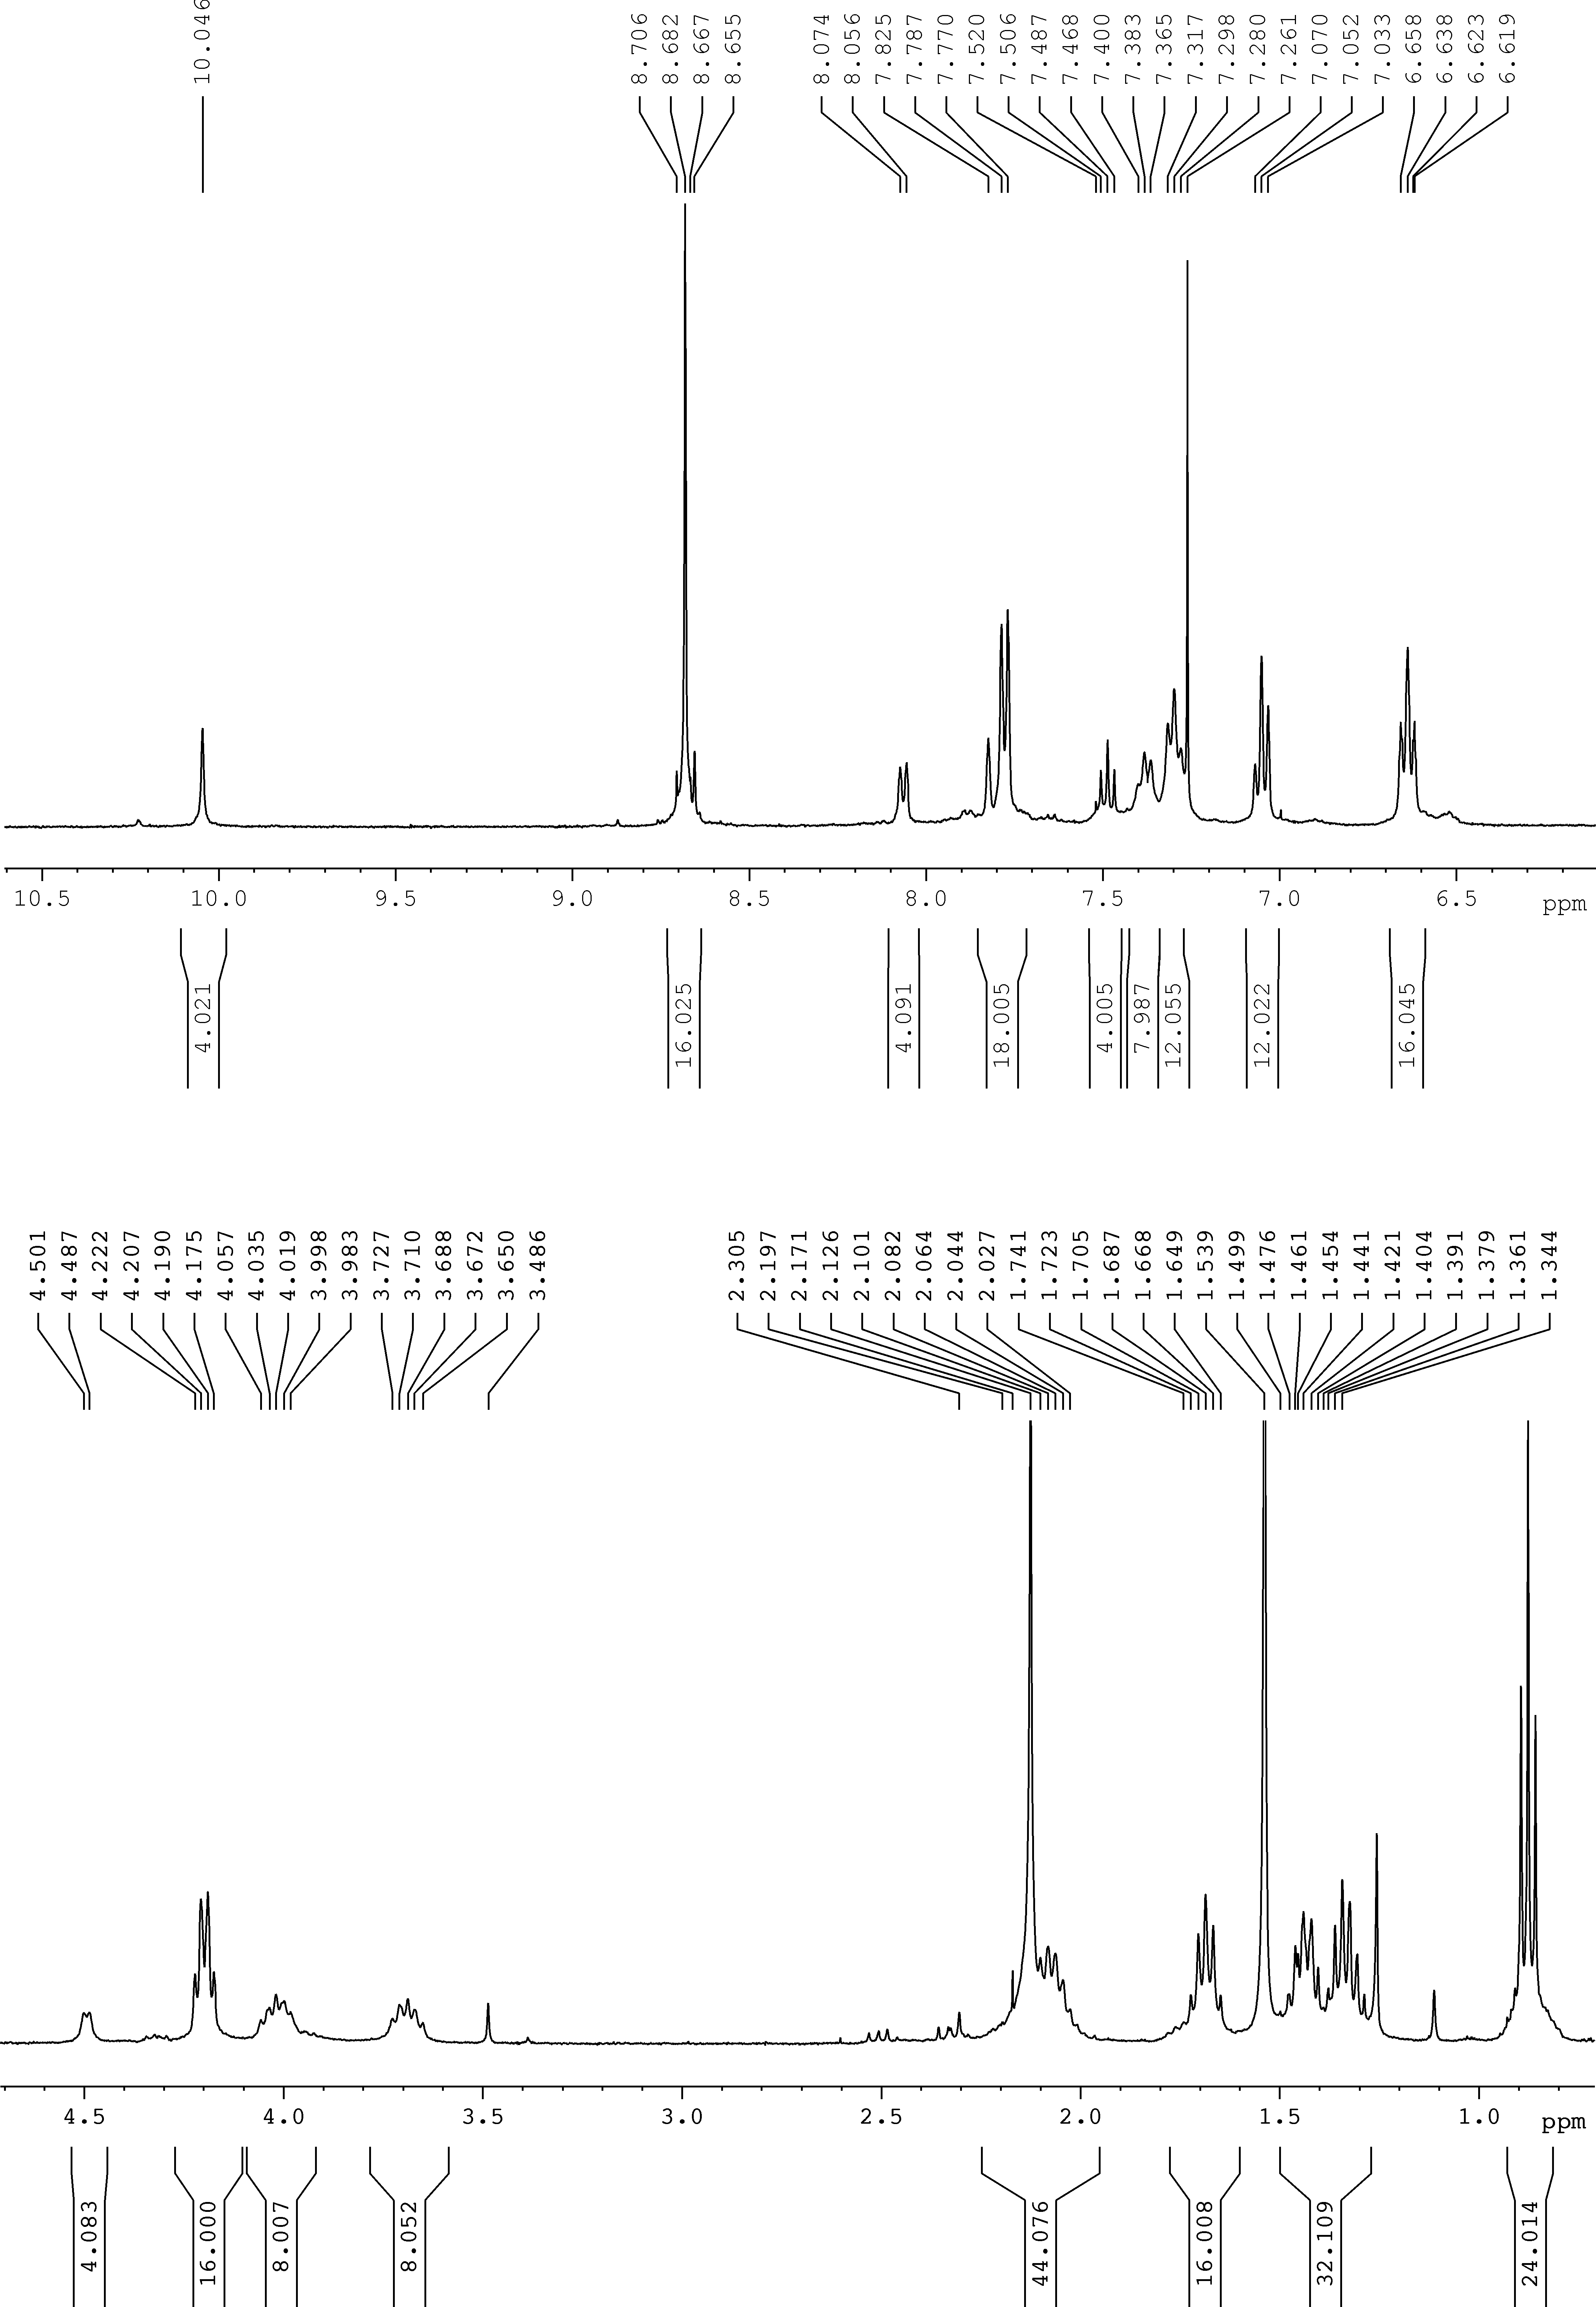


S2:


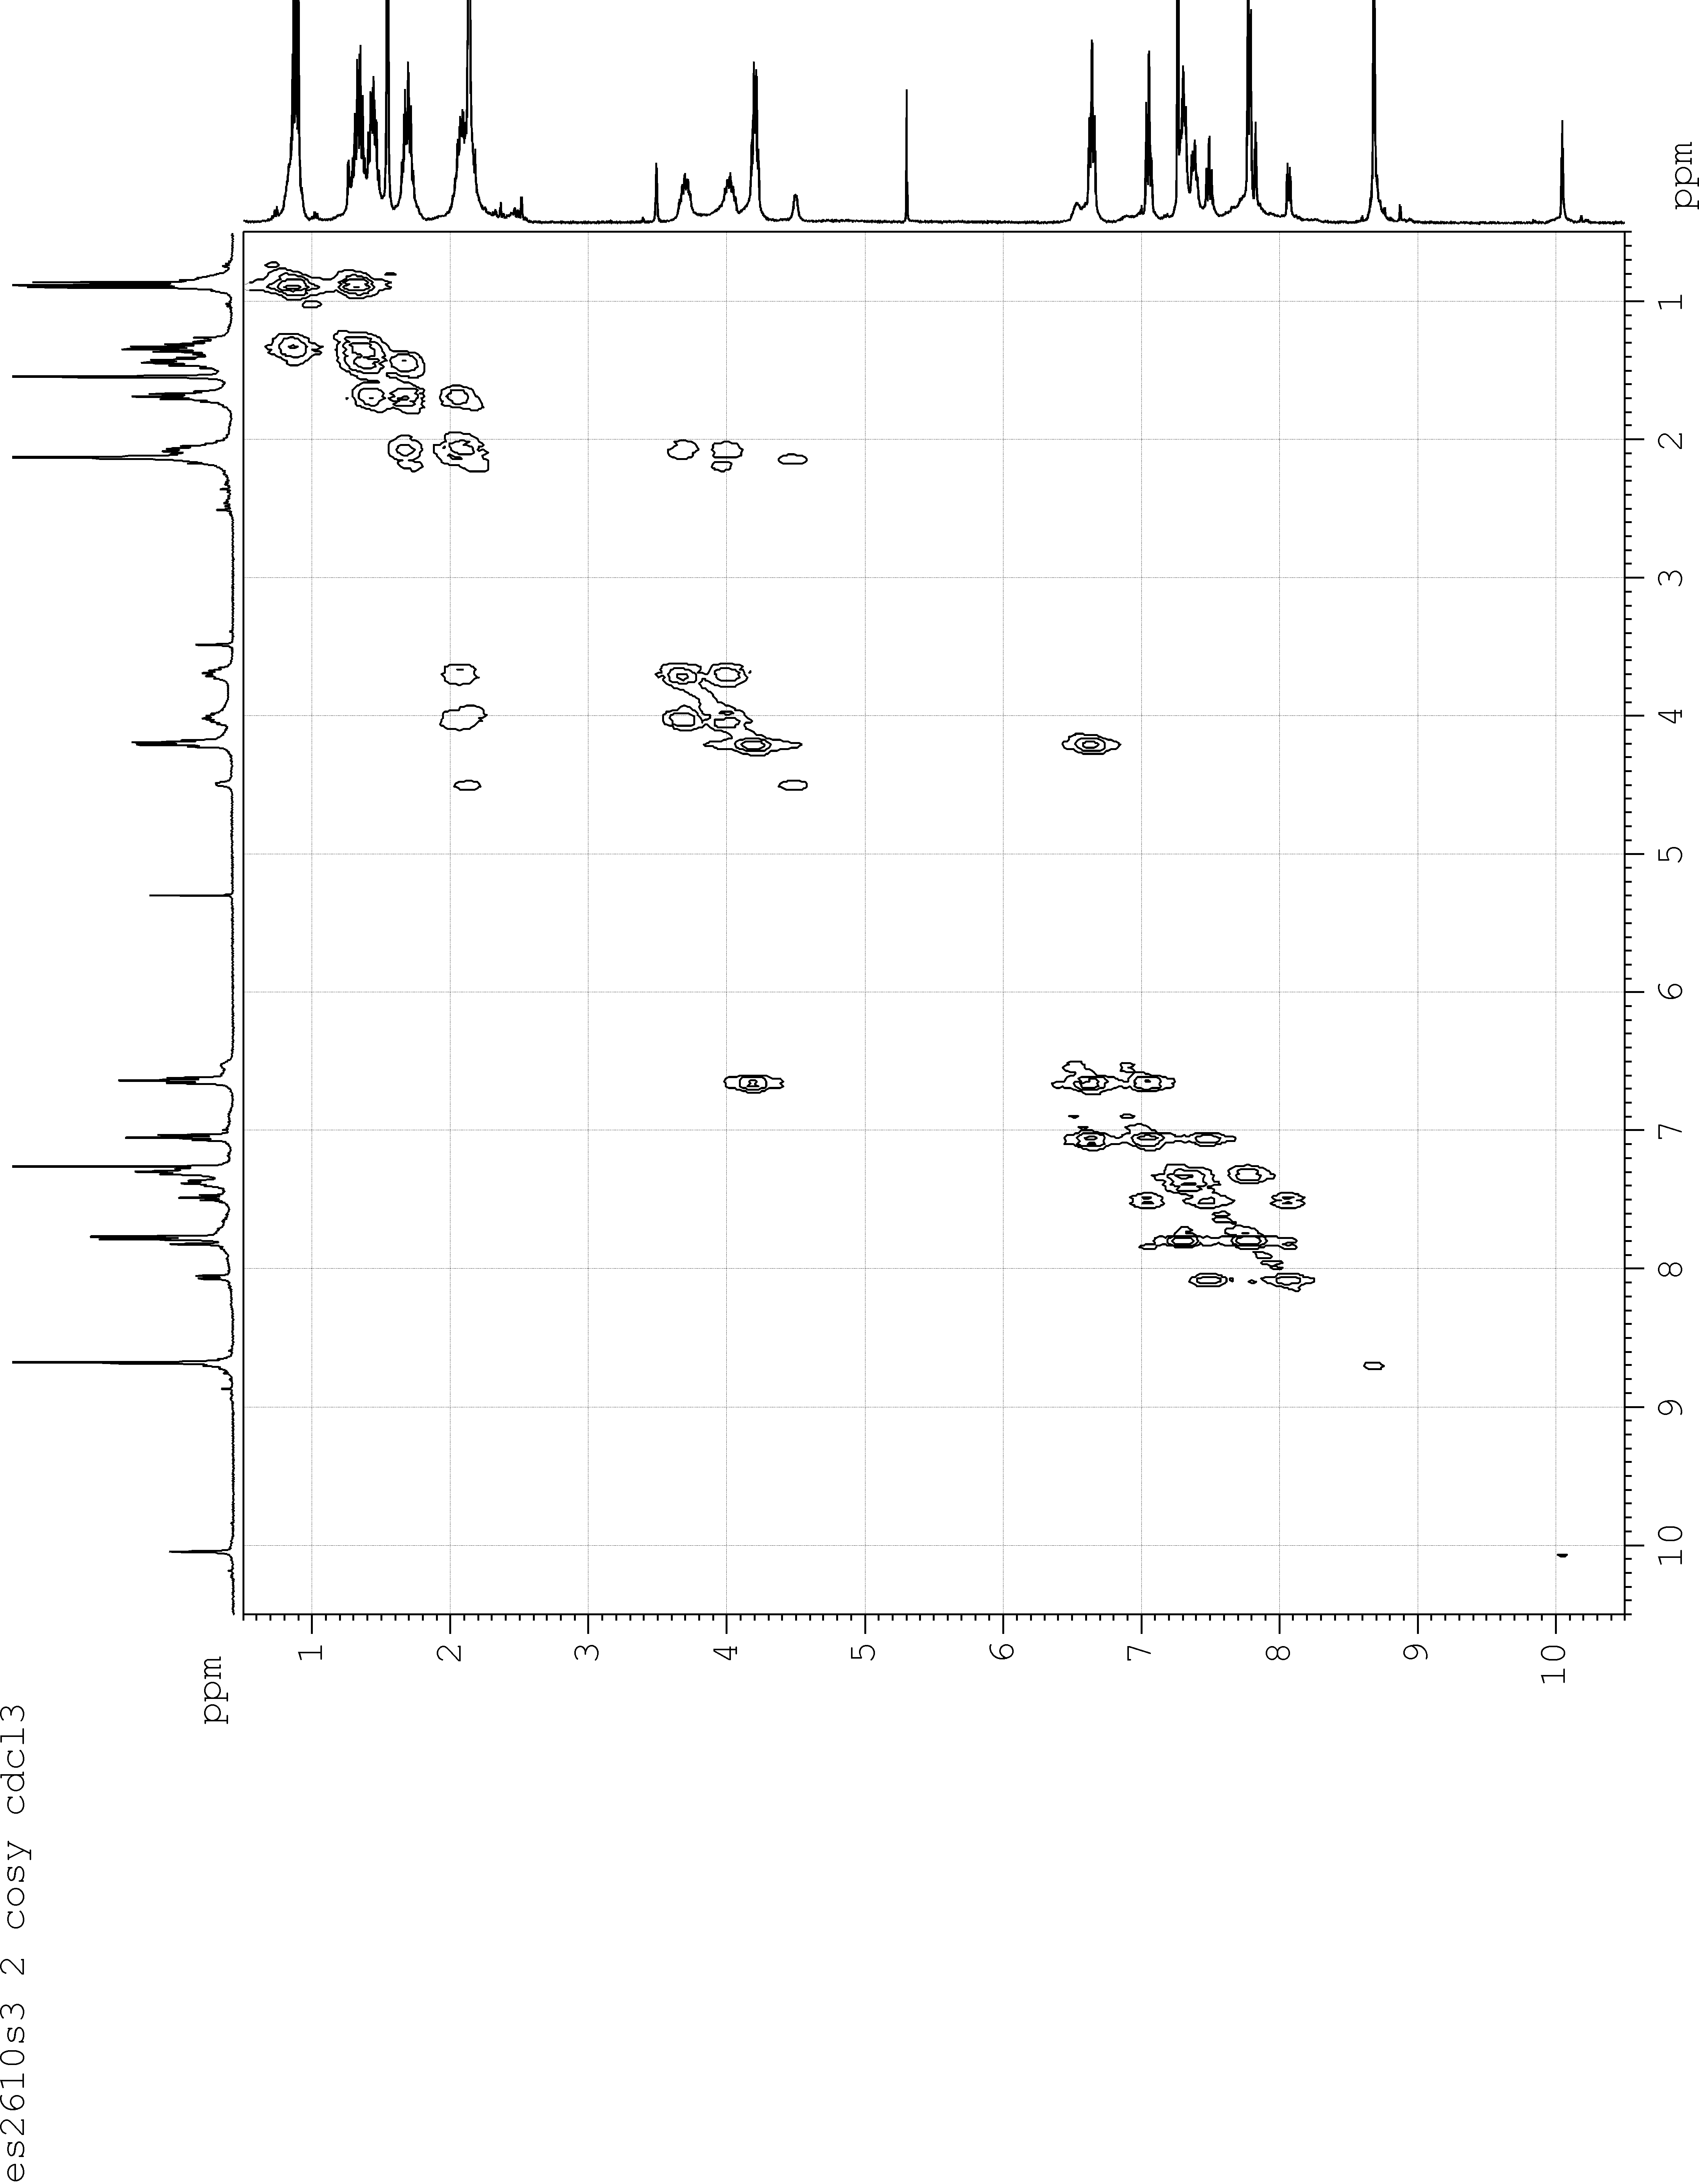


S3:


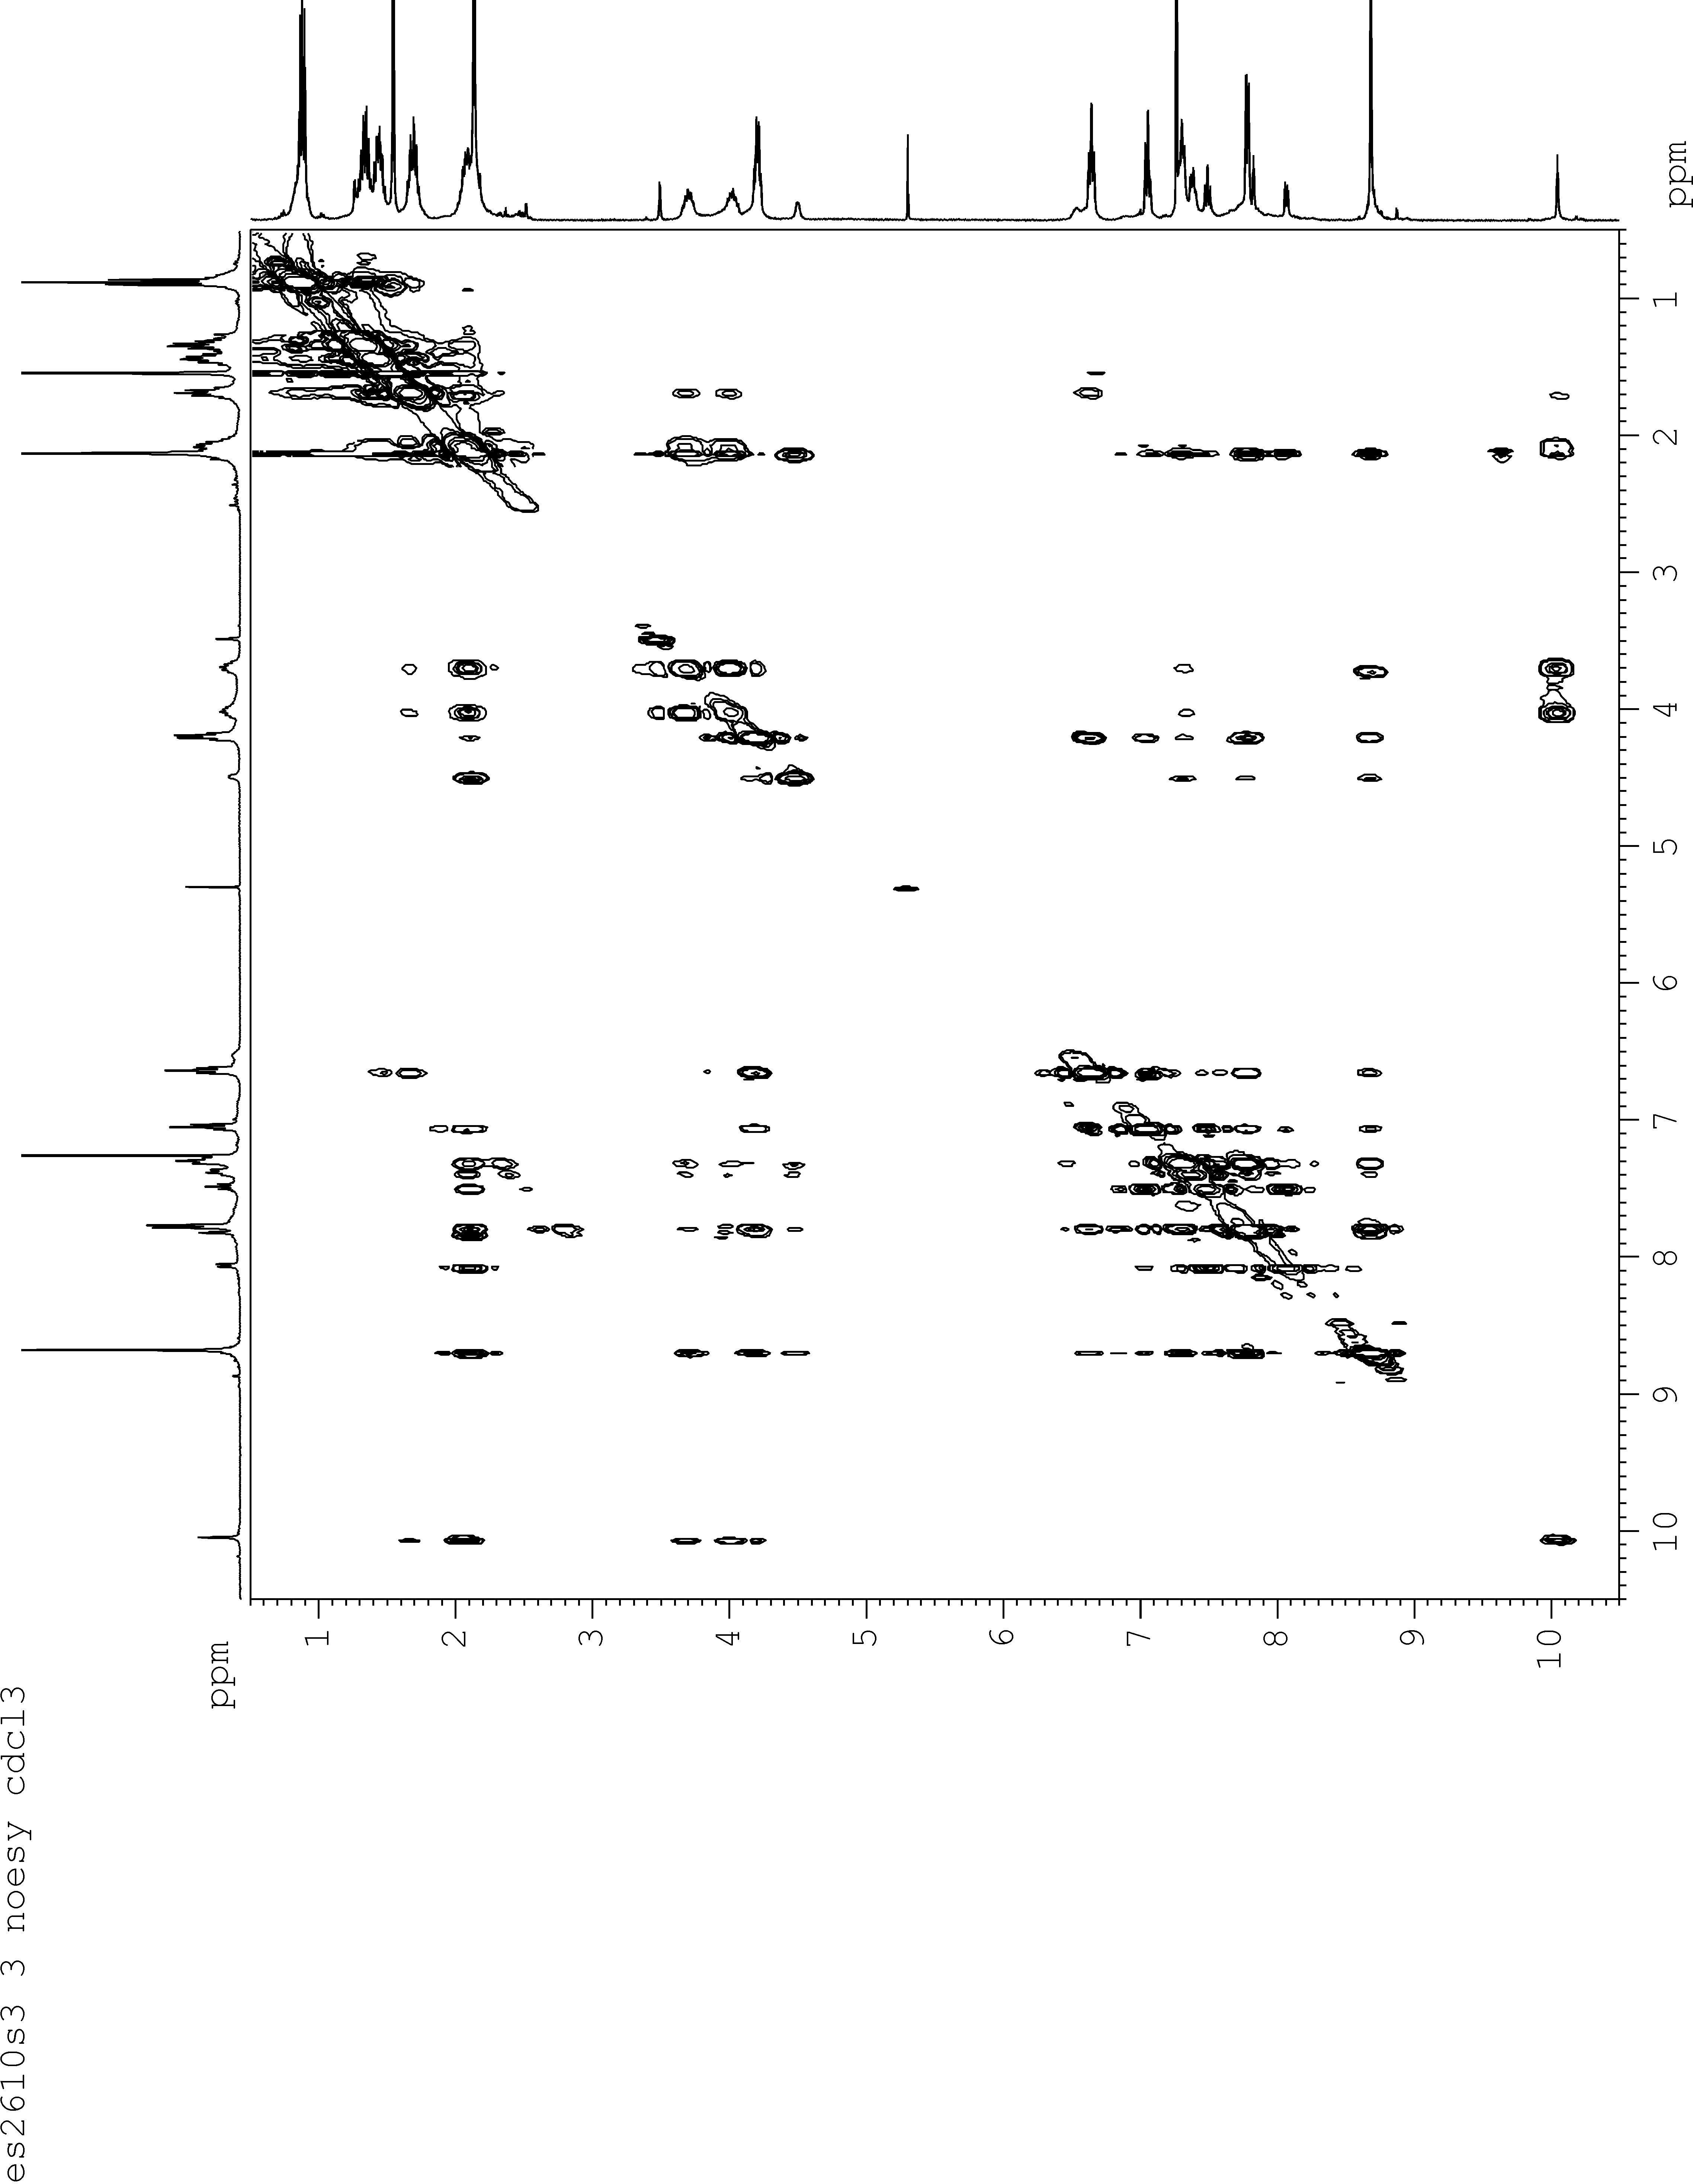

Supplement: b111019p.doc [file b111019p.doc]
